# Supplementary material for: Mesoporous silica–amine beads from blast furnace slag for CO2 capture applications
Source: Royal Society of Chemistry journal article supplement (doi:10.1039/d4nr02495h), 2024-01-01
Supplement: d4nr02495h1.pdf [file d4nr02495h1.pdf]

## Mesoporous Silica-Amine Beads from Blast Furnace Slag for CO<sub>2</sub> Capture

### Applications

Baljeet Singh,<sup>a\*</sup> Marianna Kemell,<sup>a</sup> Juho yliniemi,<sup>b</sup> Repo Timo<sup>a\*</sup>

<sup>a</sup>Department of Chemistry, University of Helsinki, FI-00014 Helsinki, Finland

<sup>b</sup>University of Oulu, Fibre and Particle Engineering Research Unit, FI-90014, Finland

[baljeet.singh@helsinki.fi](mailto:baljeet.singh@helsinki.fi)

[timo.repo@helsinki.fi](mailto:timo.repo@helsinki.fi)

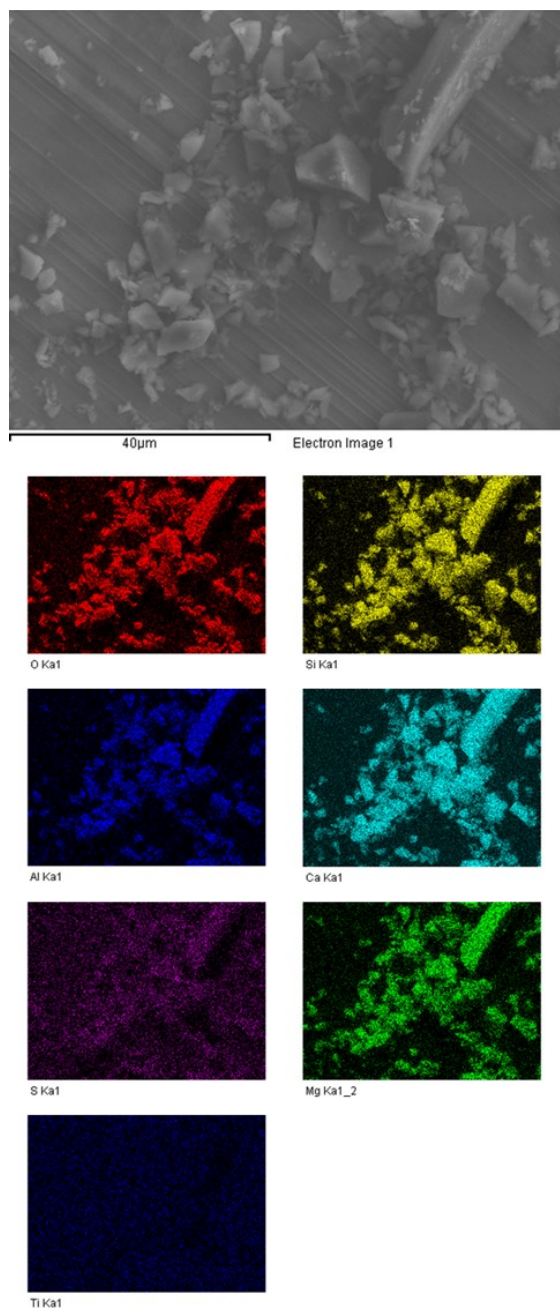

Figure S1. Elemental mapping of original BFS sample.

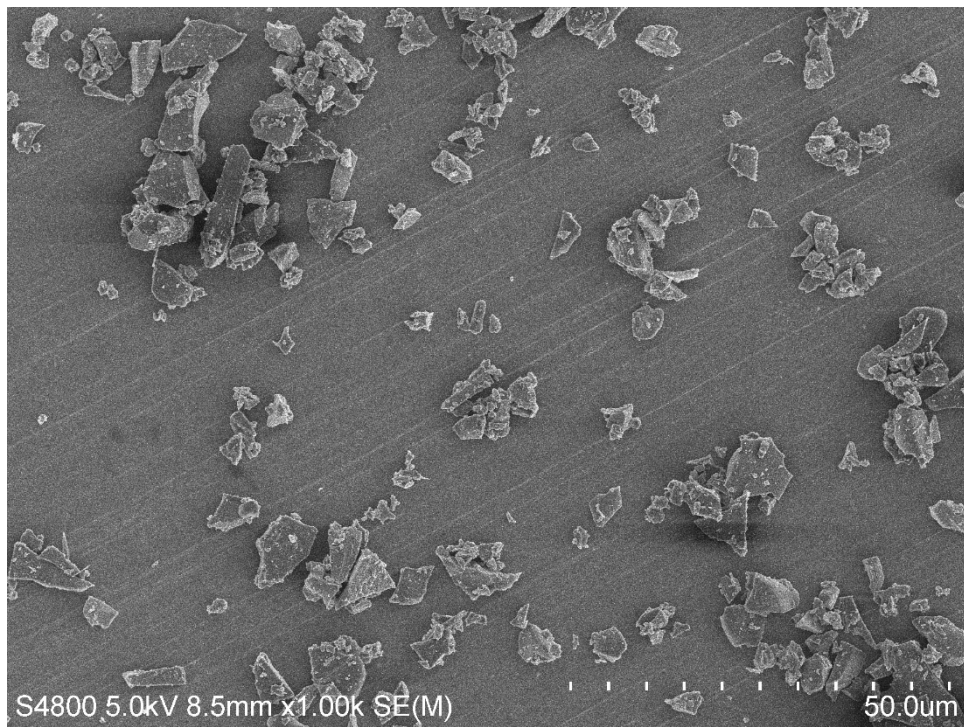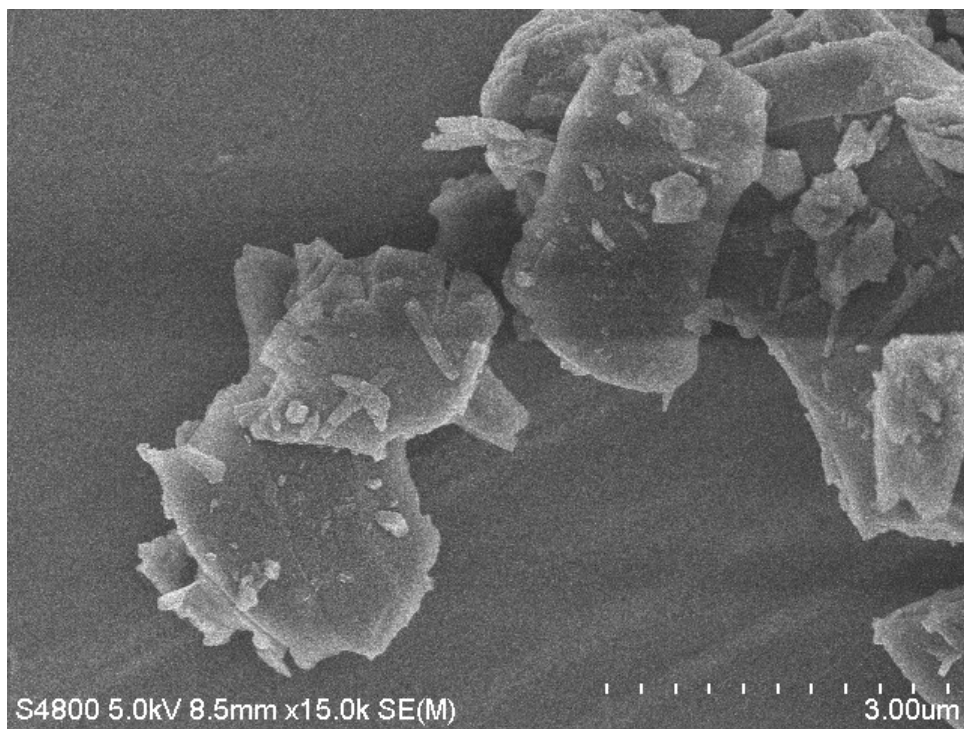

**Figure S2.** SEM images of BFS.

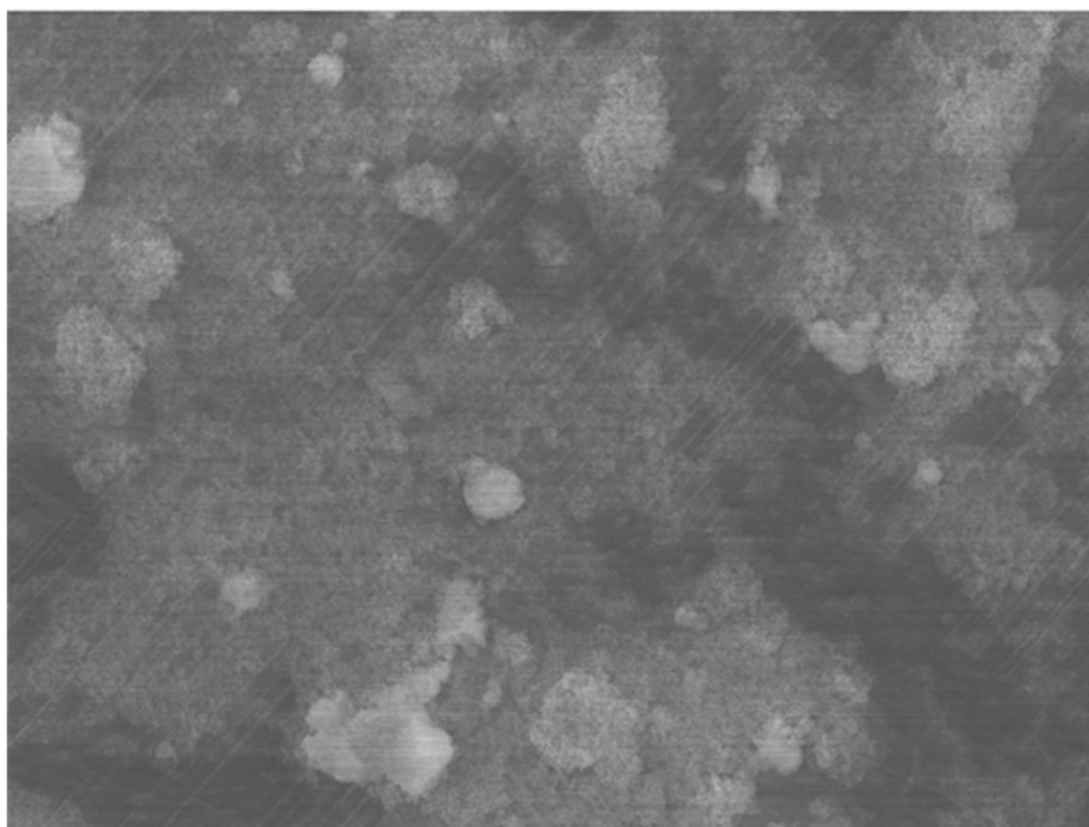

70µm

Electron Image 1

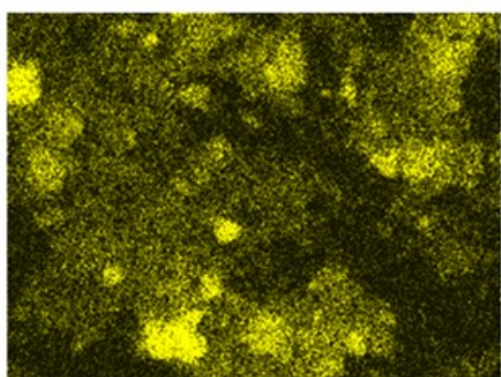

Si Ka1

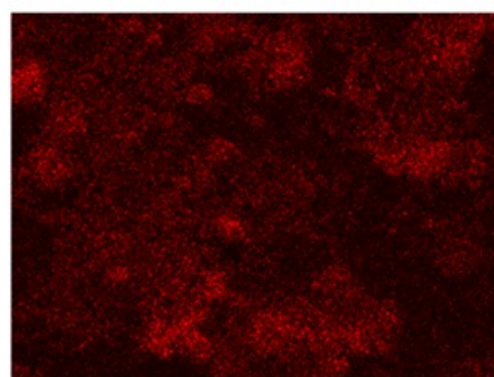

O Ka1

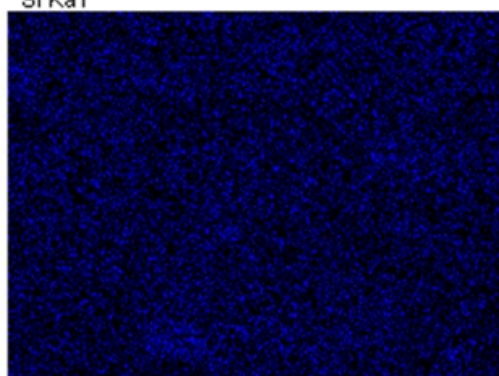

Al Ka1

**Figure S3.** Elemental mapping of mesoporous silica.

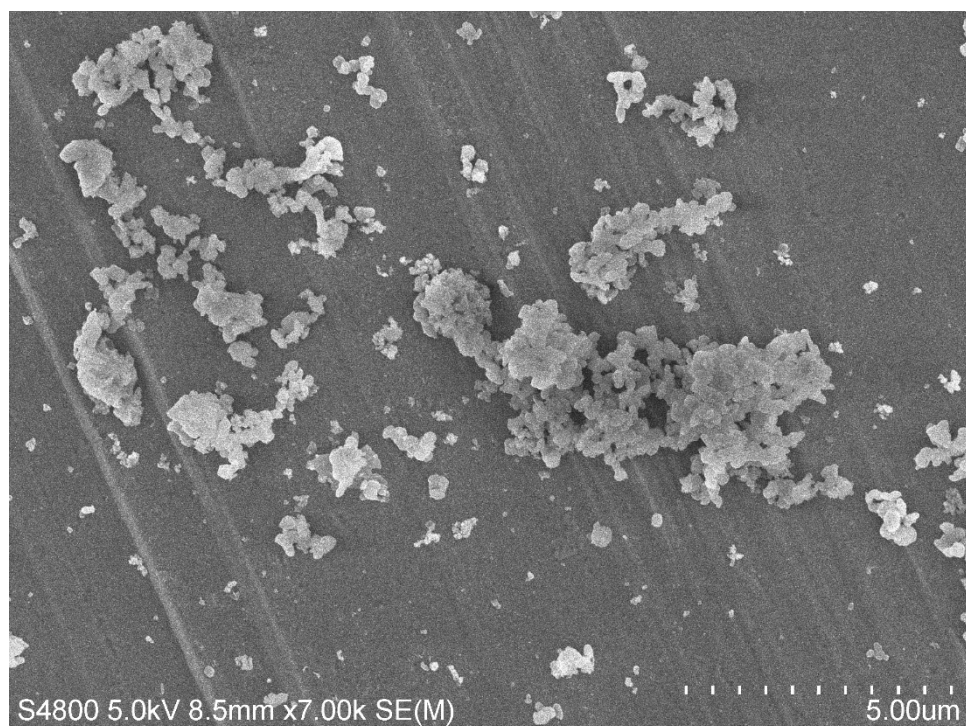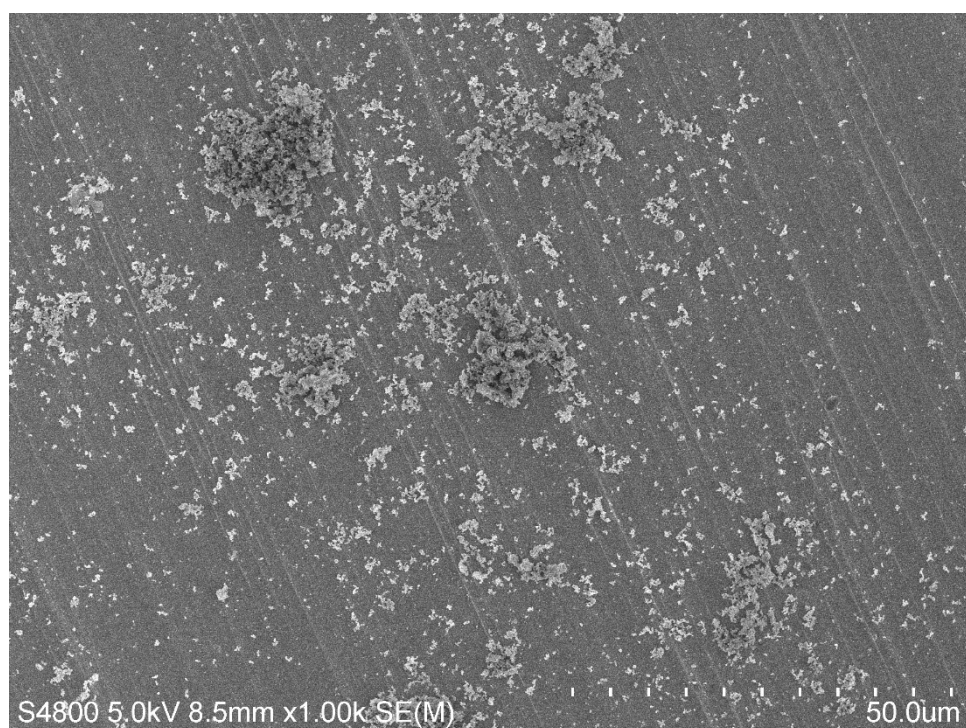

**Figure S4.** SEM images of mesoporous silica.

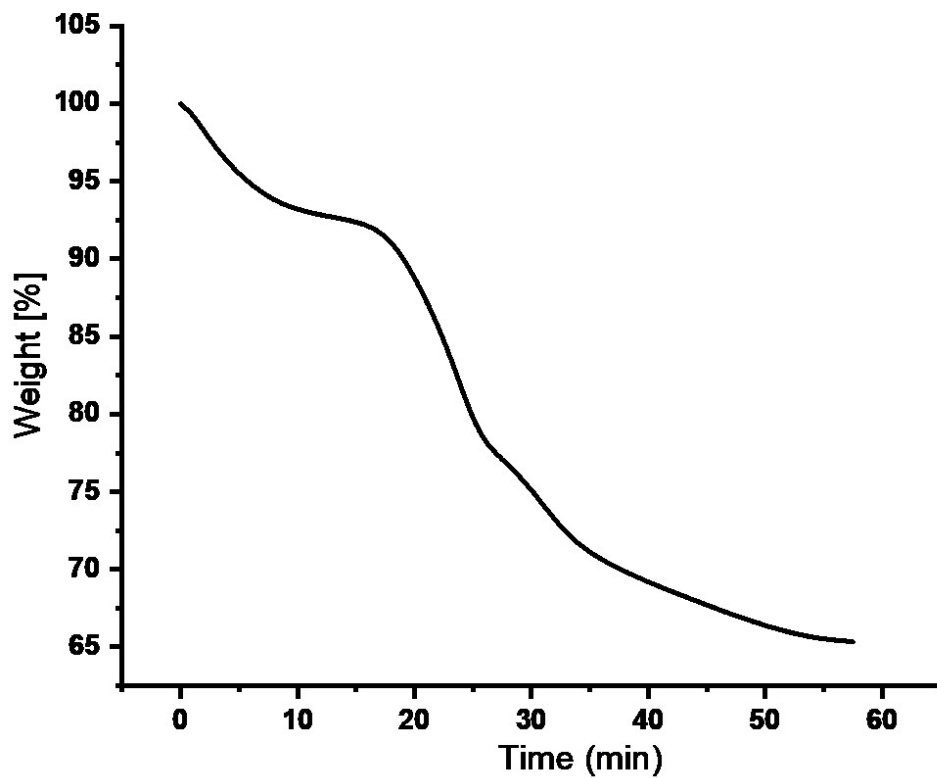

**Figure S5.** TGA analysis of mesoporous silica. TGA was performed from 25 to 600 °C with rate of 10 °C under the flow of air (50 ml/min).

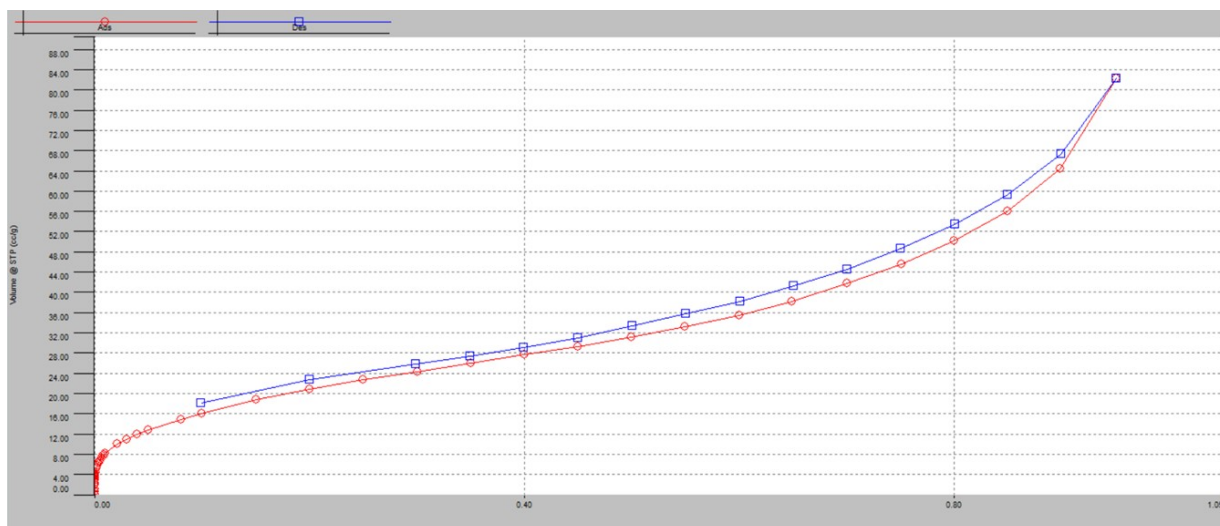

**Figure S6.** N<sub>2</sub> adsorption isotherm of mesoporous silica.

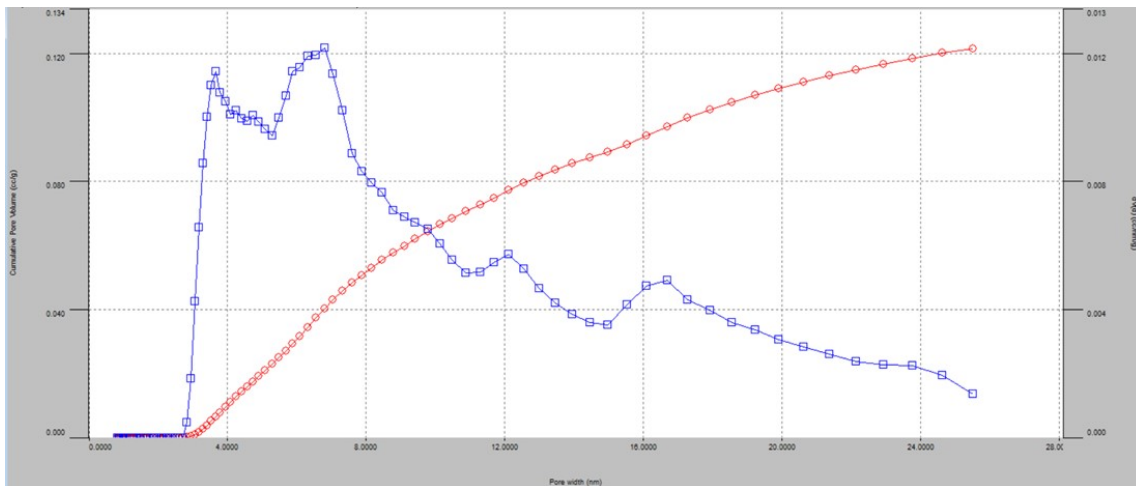

Figure S7. DFT pore size distribution of mesoporous silica.

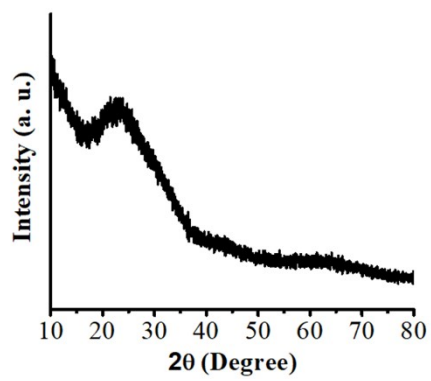

Figure S8. PXRD of mesoporous silica.

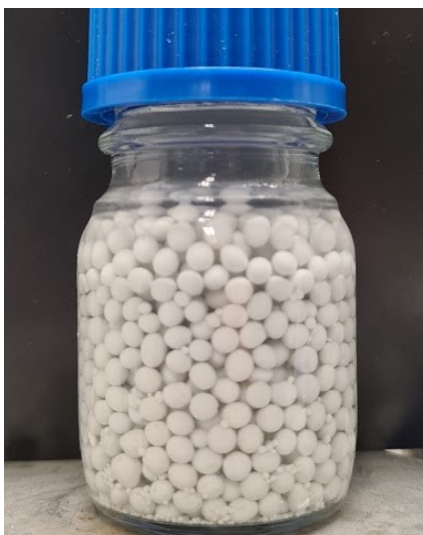

Figure S9. Digital image of mesoporous silica beads.

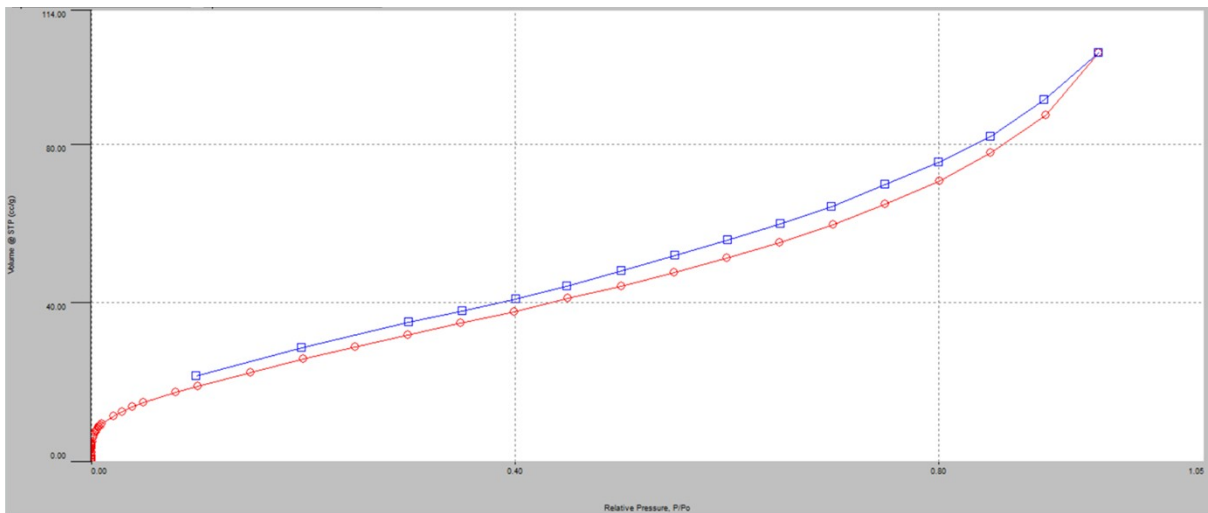

**Figure S10.** N<sub>2</sub> sorption isotherm of mesoporous silica beads.

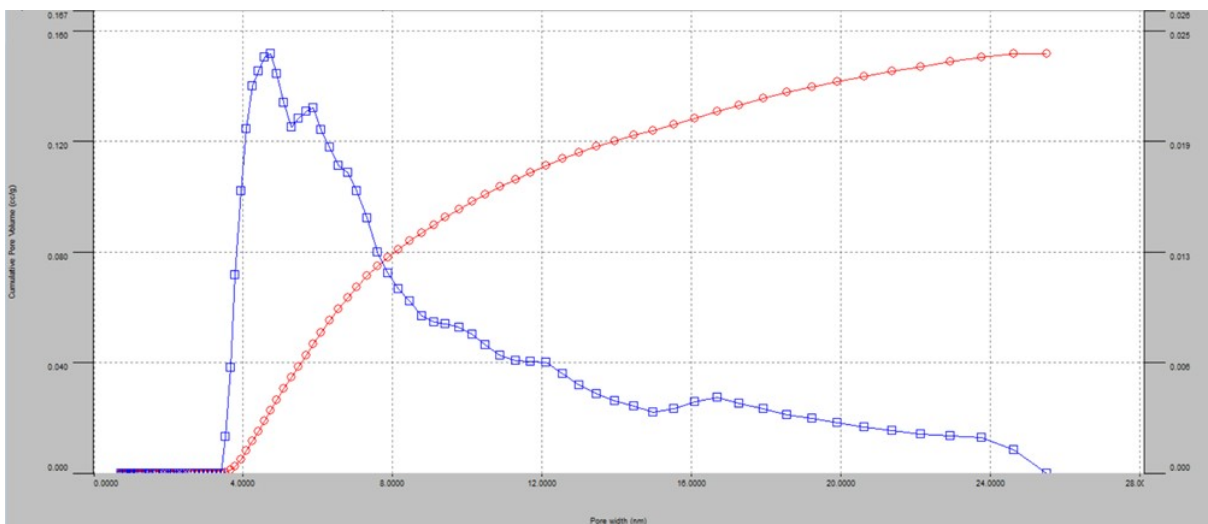

**Figure S11.** Pore size distribution of mesoporous silica beads.

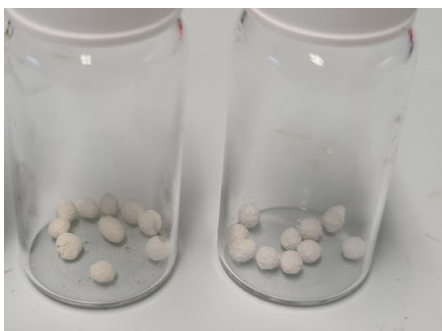

**Figure S12.** digital image of mesoporous silica beads after HMDA (left) and PEI (right) functionalization.

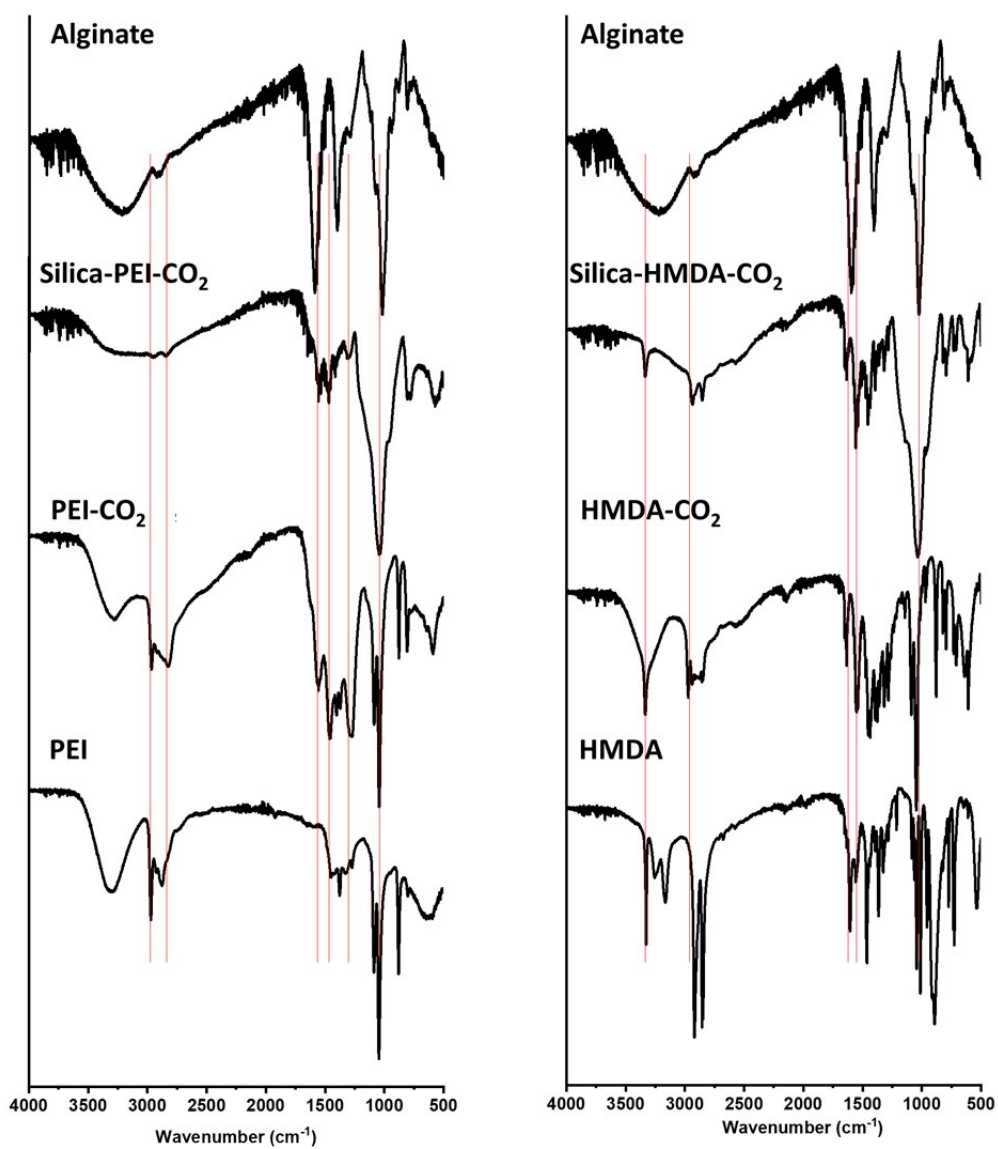

Figure S13. FTIR spectrum of various samples before and after CO<sub>2</sub> adsorption.



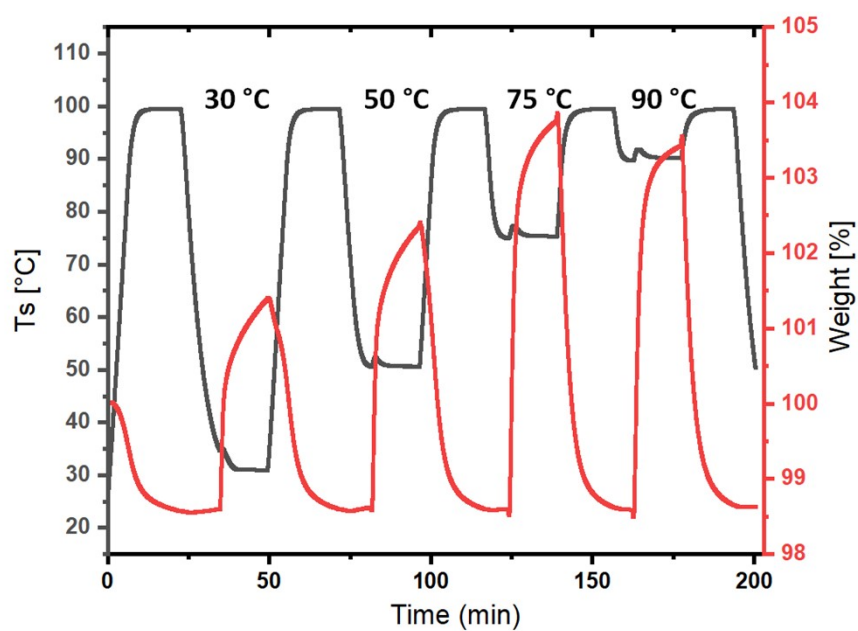

**Figure S14.** Adsorption temperature optimization. Measurements were performed at 30, 50, 75 and 90 °C.

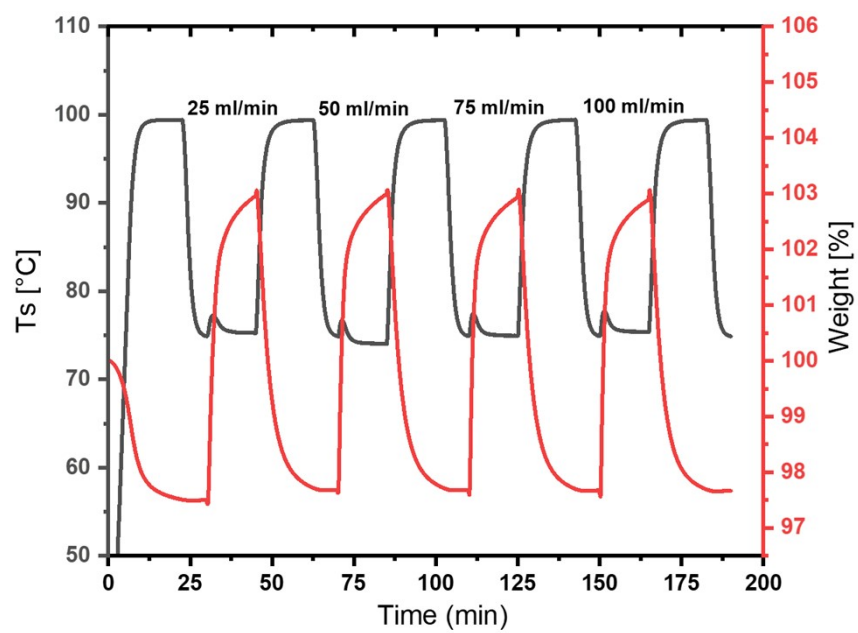

**Figure S15.** 15% CO<sub>2</sub> flow rate optimization at fixed adsorption temperature i.e. 75 °C.

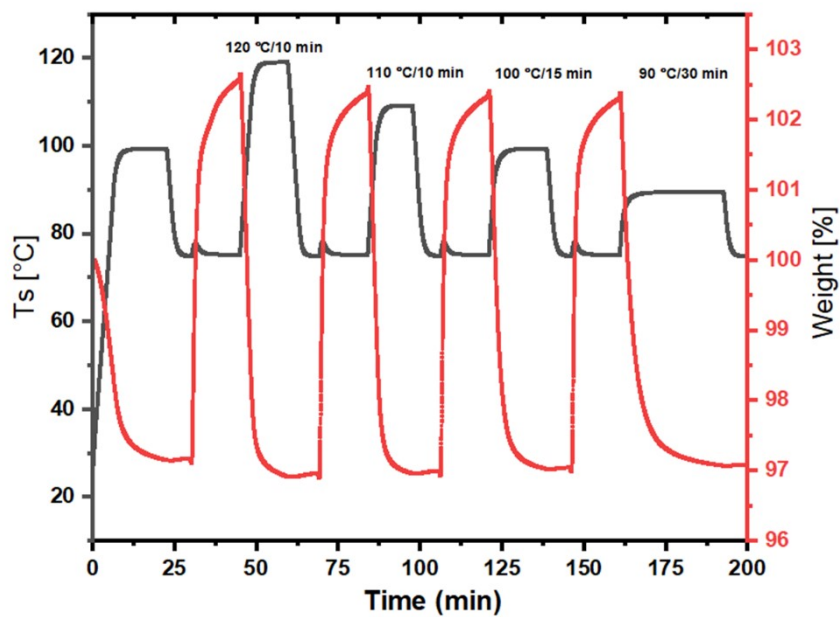

Figure S16. Desorption temperature optimization at a constant flow rate.

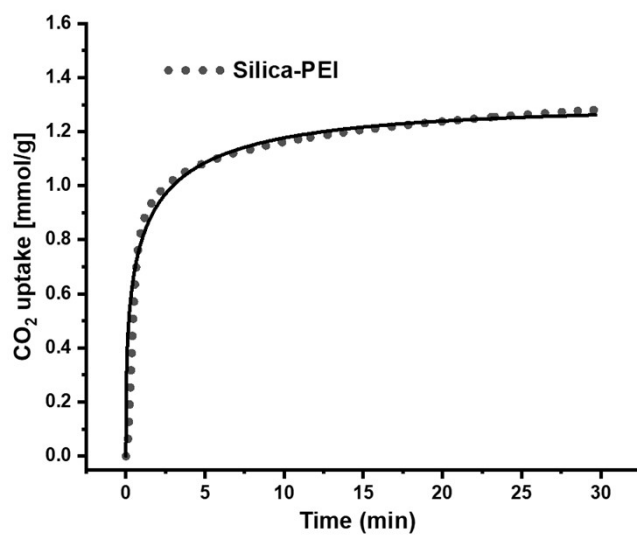

Figure S17. CO<sub>2</sub> adsorption of powder samples at 75 °C for 30 min. 15% CO<sub>2</sub> in N<sub>2</sub> was used for measurement.

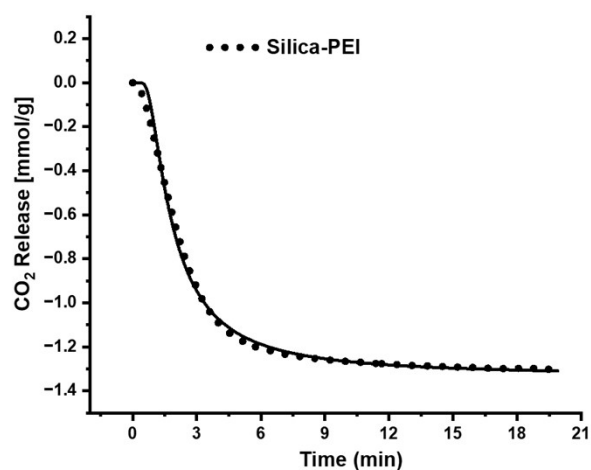

**Figure S18.** CO<sub>2</sub> desorption of powder samples at 100 °C for 15 min. 15% CO<sub>2</sub> in N<sub>2</sub>.

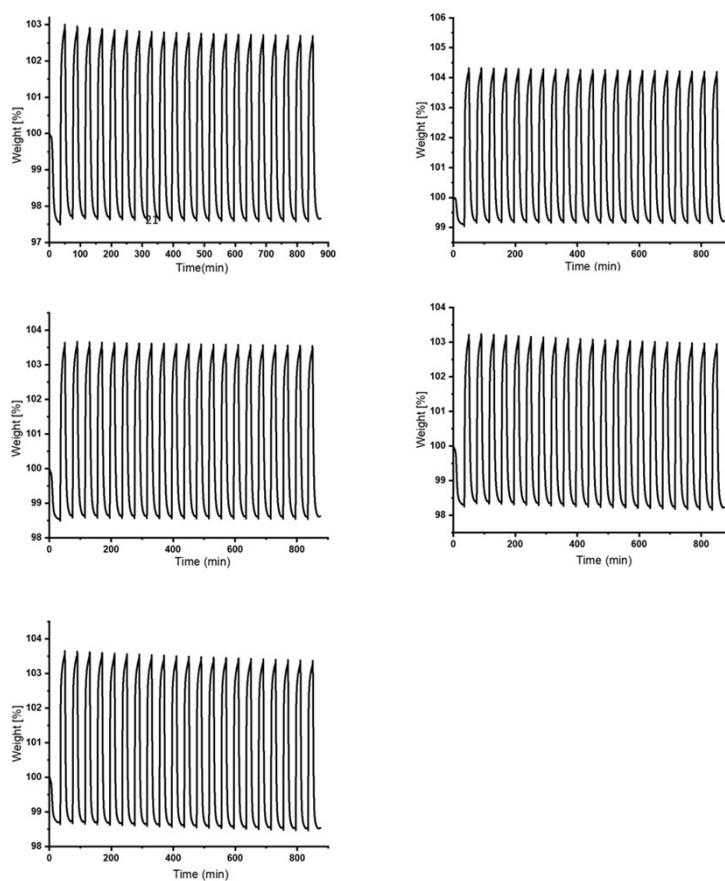

**Figure S19.** Five sets of 21 adsorption-desorption cycles of Silica-PEI bead (total of 105 cycles were recorded), cycling measurements were performed at 75 °C for 15 min, 25 ml/min Flow, Desorption at 100 °C for 15 min under the flow of N<sub>2</sub> gas (50 ml/min).

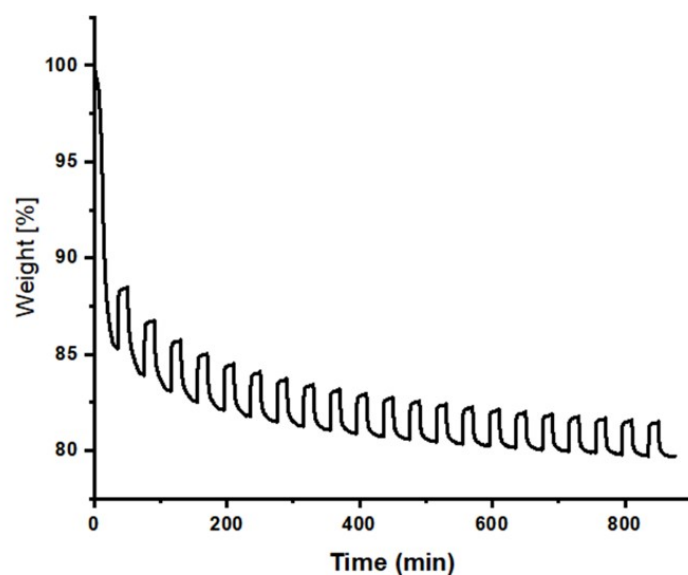

**Figure S20.** 20 adsorption-desorption cycles of silica-HMDA bead, measurements were performed at 75 °C for 15 min, 15% CO<sub>2</sub> flow: 25 ml/min, desorption at 100 °C for 15 min under the flow of N<sub>2</sub> gas (50 ml/min).

**Table S1:** SEM-EDX analysis. All data in wt.%.

|   |                     | Mg    | Al    | Si    | Ca    | Ti   | S    | O     |
|---|---------------------|-------|-------|-------|-------|------|------|-------|
| 1 | Original            | 7.31  | 9.55  | 16.19 | 21.60 | 1.32 | 1.11 | 42.92 |
| 2 | Metal dissolution   | 1.79  | 2.42  | 41.05 | -     | -    | -    | 51.96 |
| 3 | Metal Precipitation | 32.02 | 13.62 | 3.32  | 10.06 | -    | -    | 40.98 |
| 4 | Ca-separation       | -     | 2.41  | -     | 68.22 | -    | -    | 29.01 |
| 5 | Mesoporous Silica   | -     | 5.33  | 42.04 | -     | -    | -    | 52.63 |

-not detected

**Table-S2:** CHN analysis of amine-functionalized beads.

| Weight(mg) | Name        | N (wt. %) | C (wt. %) | H (wt.% %) | S (wt. %) |
|------------|-------------|-----------|-----------|------------|-----------|
| 1.8700     | Silica-PEI  | 12.02     | 31.34     | 6.826      | 0.000     |
| 1.8610     | Silica-PEI  | 12.42     | 31.72     | 7.109      | 0.000     |
| 2.1850     | Silica-PEI  | 12.86     | 32.38     | 7.377      | 0.000     |
| 1.9420     | Silica-HMDA | 10.27     | 36.03     | 8.060      | 0.000     |
| 1.9670     | Silica-HMDA | 9.92      | 35.46     | 7.956      | 0.000     |
| 2.1090     | Silica-HMDA | 9.46      | 35.55     | 7.570      | 0.000     |

**Table S3.** Fitting parameter of Avrami kinetic model for the desorption of CO<sub>2</sub> on silica-PEI bead.

| Kinetic Models | Avrami [ $Q_e(1-\exp(-(k_A x)^{n_A}))$ ] |                    |                   |        |
|----------------|------------------------------------------|--------------------|-------------------|--------|
| Parameters     | $Q_e$                                    | $k_A$              | $n_A$             | $R^2$  |
| 90 °C          | $-1.192 \pm 0.0003$                      | $0.272 \pm 0.0003$ | $0.977 \pm 0.001$ | 0.9999 |
| 100 °C         | $-1.210 \pm 0.0004$                      | $0.376 \pm 0.0005$ | $1.230 \pm 0.003$ | 0.9999 |
| 110 °C         | $-1.239 \pm 0.0004$                      | $0.410 \pm 0.0005$ | $1.467 \pm 0.004$ | 0.9999 |
| 120 °C         | $-1.289 \pm 0.0005$                      | $0.396 \pm 0.0006$ | $1.492 \pm 0.005$ | 0.9999 |

**Table S4:** Powder sample adsorption Kinetic parameters.

| Kinetic Models | Avrami [ $Q_e*(1-EXP(-(ka*x)^{nA}))$ ] |                   |                   |        |
|----------------|----------------------------------------|-------------------|-------------------|--------|
| Parameters     | $Q_e$                                  | $k_a$             | $n_A$             | $R^2$  |
| Silica-PEI     | $1.29 \pm 0.003$                       | $0.904 \pm 0.011$ | $0.399 \pm 0.004$ | 0.9999 |

**Table S5:** Powder sample desorption Kinetic parameters (desorption temperature 100 °C, 15 min, 50 ml/min N<sub>2</sub> flow).

| Kinetic Models | Avrami [ $Q_e(1-\exp(-(k_A x)^{n_A}))$ ] |                  |                  |        |
|----------------|------------------------------------------|------------------|------------------|--------|
| Parameters     | $Q_e$                                    | $k_A$            | $n_A$            | $R^2$  |
| Silica-PEI     | $-1.33 \pm 0.006$                        | $0.65 \pm 0.008$ | $1.57 \pm 0.006$ | 0.9999 |
